# Supplementary material for: An ultrasensitive electrochemical immunosensor for the detection of human immunoglobulin G based on Ag@BSA microspheres
Source: Royal Society of Chemistry journal article supplement (doi:10.1039/c5ra22654f), 2015-01-01
Supplement: c5ra22654f1.pdf [file c5ra22654f1.pdf]

# An ultrasensitive electrochemical immunosensor for the detection of human immunoglobulin G based on Ag@BSA microspheres

Hongfang Zhang<sup>a\*</sup>, Danlei Ning<sup>a</sup>, Jianbin Zheng<sup>b\*</sup>

<sup>a</sup> Ministry of Education Key Laboratory of Synthetic and Natural Functional Molecular Chemistry, College of Chemistry and Materials Science; <sup>b</sup> Shaanxi Provincial Key Laboratory of Electroanalytical Chemistry, Northwest University, Xi'an 710127, P. R. China

\*Corresponding Author

E-mail: zhanghf@nwu.edu.cn (H. Zhang); zhengjb@nwu.edu.cn (J. Zheng)

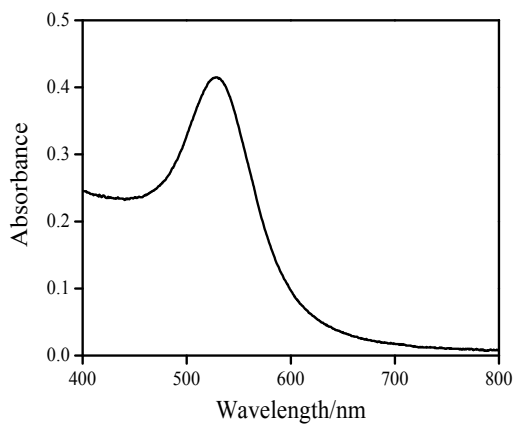

**Figure S1.** UV-vis spectrum of  $\beta$ -CD/Au
